## Articles of interest in other COB journals

### From *Journal of Cell Science*

#### **Activin increases the number of synaptic contacts and the length of dendritic spine necks by modulating spinal actin dynamics**

Yoko Shoji-Kasai, Hiroshi Ageta, Yoshihisa Hasegawa, Kunihiro Tsuchida, Hiromu Sugino and Kaoru Inokuchi

Shoji-Kasai, Y. et al. 2007. *J. Cell Sci.* doi:10.1242/jcs.012450

#### **Sox17 plays a substantial role in late-stage differentiation of the extraembryonic endoderm in vitro**

Masafumi Shimoda, Masami Kanai-Azuma, Kenshiro Hara, Satsuki Miyazaki, Yoshiakira Kanai, Morito Monden and Jun-ichi Miyazaki

Shimoda, M. et al. 2007. *J. Cell Sci.* doi:10.1242/jcs.007856
